# Supplementary material
Source: PubMed Central journal article supplement (PMC5342628)
Supplement: NIHMS846569-supplement-supplement.pdf [file NIHMS846569-supplement-supplement.pdf]

## **1. Supplemental Methods**

### **Measures**

The following measures were used to examine the psychopathology in the first episode psychosis: Positive and Negative Syndrome Scale, PANSS(1); Scale for the Assessment of Negative Symptoms, SANS(2); Calgary Depression Scale, depression scale(3); Snaith-Hamilton Pleasure Scale, pleasure scale(4); Apathy Evaluation Scale, apathy scale(5); Global Assessment of Functioning, GAF(6).

The Repeatable Battery for the Assessment of Neuropsychological Status (RBANS), was used to assess cognitive function in first episode psychosis. It has been validated in psychotic patients and comprises five subscales: immediate memory, visuospatial ability, language, attention, and delayed memory (7, 8).

### **MRI data acquisition**

Proton density-weighted (PD) brain MRI scans (TE = 17, TR = 6000, FOV = 22 cm, matrix = 256 × 256, slice thickness = 2 mm, number of excitations = 2) was obtained for each subject using a 1.5T Signa scanner (General Electric Medical Systems, Milwaukee, WI, USA) for 6 of healthy volunteers and 11 of first episode psychosis. For the remaining 8 patients with first episode psychosis and 14 healthy volunteers, PD MRI images (TE= Min full, TR = 6000, FOV = 22 cm, slice thickness = 2 mm, and number of acquisitions = 1) were acquired using a 3T MR-750 scanner (General Electric Medical Systems). MRI images were used for the anatomical delineation of regions and the quantification of PET images. As we previously reported (9, 10), differences in MRI acquisition parameters and scanner used did not have a significant effect on [<sup>18</sup>F]FEPPA outcome measures (data not shown).

## **PET data acquisition**

All [ $^{18}\text{F}$ ]FEPPA PET scans were performed using a high-resolution CPS- high resolution research tomograph PET scanner (Siemens Molecular Imaging, Knoxville, TN, USA), which measures radioactivity in 207 1.2-mm thick slices. Dynamic emission data were acquired for 125 minutes (34 time frames: 1 frame of variable length,  $5 \times 30$  s,  $1 \times 45$  s,  $2 \times 60$  s,  $1 \times 90$  s,  $1 \times 120$  s,  $1 \times 210$  s, and  $22 \times 300$  s) following an intravenous bolus injection of  $182.94 \pm 13.08$  (mean  $\pm$  SD) MBq of [ $^{18}\text{F}$ ]FEPPA.

Kinetic parameters of [ $^{18}\text{F}$ ]FEPPA were derived from the time activity curves using two-tissue compartment model and plasma input function to obtain the binding outcome measure total distribution volume ( $V_T$ ) for each region of interest, which has been validated for [ $^{18}\text{F}$ ]FEPPA quantification (11). Kinetic analysis of regions of interest incorporated a 5% contribution from the blood in the vascular lumen (12) in the fitting of the two-compartment kinetic model using PMOD software (PMOD Technologies, Zurich, Switzerland).

### *Voxel-based PET image analysis*

Parametric images of [ $^{18}\text{F}$ ]FEPPA  $V_T$  were generated using the Logan graphical analysis method (14). A wavelet-based kinetic modeling approach was applied to increase the signal-to-noise ratio while maintaining the resolution (15). To examine voxel-wise group differences of  $V_T$ , an independent sample T-test was conducted using Statistical Parametric Mapping (SPM8-<http://www.fil.ion.ucl.ac.uk/spm/software/spm8>). TSPO genotype (rs6971 polymorphism) was included as a covariate. Significant level for the whole brain analysis was thresholded at  $p < 0.05$ , FWE corrected at the voxel level.

## **Input function measurement**

Arterial blood was collected for the first 22.5 min after radiotracer injection at a rate of 2.5 mL/min and blood radioactivity levels were measured using an automatic blood sampling system (Model PBS-101, Veenstra Instruments, Joure, Netherlands). Additionally, 7 mL blood samples were drawn manually at -5, 2.5, 7, 12, 15, 20, 30, 45, 60, 90, and 120 min following tracer injection. The relative proportion of radiolabeled metabolites was measured using high-

performance liquid chromatography (HPLC) and dispersion- and metabolite-corrected plasma input function was generated as previously described (16, 17).

### **TSPO polymorphism genotyping**

Using high salt extraction method, DNA samples were extracted from peripheral white blood cells (18). A single-nucleotide polymorphism (rs6971), which is known to affect binding of second-generation TSPO PET radioligands (17, 19-21), was genotyped using a TaqMan assay (Applied Biosystems, Foster City, CA, USA), as previously described (9, 10).

## **2. Supplemental Results**

### **Differences in [<sup>18</sup>F]FEPPA V<sub>T</sub> between psychotic patients and healthy volunteers**

After excluding subjects who were not in their first episode of psychosis (n=4), the group effects on V<sub>T</sub> remained non-significant ( $F_{(2, 31)} = 1.04$ ,  $P = .37$ ) and healthy volunteers had non-significant higher uptake (15.4%) than first episode psychosis in hippocampus ( $F_{(1, 32)} = 1.87$ ,  $p = .18$ ) and dorsolateral prefrontal cortex ( $F_{(1, 32)} = 0.42$ ,  $p = .52$ , 6.1% higher in healthy volunteers than first episode psychosis). Same results remain after correction for partial volume effects ( $F_{(2,31)} = .96$ ,  $p = .39$ ), the non-significant elevated uptake of healthy volunteers remained in hippocampus ( $F_{(1, 32)} = 1.77$ ,  $p = .19$ , 14.7% higher in healthy volunteers than first episode psychosis ) and dorsolateral prefrontal cortex ( $F_{(1, 32)} = 0.49$ ,  $p = .49$ , 6.6% higher in healthy volunteers than first episode psychosis ).

### **Differences in DVR with cerebellum as denominator (DVR<sub>cer</sub>) between first episode psychosis and healthy volunteers**

There was no significant group effect on [<sup>18</sup>F]FEPPA V<sub>T</sub> in cerebellum, before ( $F_{(1,36)} = .07$ ,  $p = .80$ ) or after correction for partial volume effects ( $F_{(1,36)} = .08$ ,  $p = .77$ ).

We found no significant effect of clinical group on DVR<sub>cer</sub> ( $F_{(2, 35)} = 1.87$ ,  $p = .17$ ). While not statistically significant, healthy volunteers show higher DVR in hippocampus ( $F_{(1,36)} = 2.42$ ,  $p = .13$ ; 12.1% higher in healthy volunteers than first episode psychosis) and dorsolateral prefrontal cortex ( $F_{(1,36)} = 2.64$ ,  $p = .11$ ; 6.7% higher in healthy volunteers than first episode psychosis).

Information on the results after partial volume correction and also other regions of interest is reported in ST2.

### **Differences in DVR with whole brain as denominator ( $DVR_{WB}$ ) between first episode psychosis and healthy volunteers**

[ $^{18}F$ ]FEPPA  $V_T$  of whole brain did not differ significantly between the two clinical groups before ( $F_{(1,36)} = .13, p = .73$ ) or after partial volume effect correction ( $F_{(1,36)} = .48, p = .49$ ).

No significant differences in  $DVR_{WB}$  were observed between the groups ( $F_{(2, 35)} = 1.66, p = .21$ ). Although not significant, healthy volunteers had higher  $DVR_{WB}$  than first episode psychosis in hippocampus ( $F_{(1, 36)} = 1.71, p = .20$ ; 9.4% higher in healthy volunteers than first episode psychosis) and dorsolateral prefrontal cortex ( $F_{(1, 36)} = 1.71, p = .20$ ; 3.7% higher in healthy volunteers than first episode psychosis). Results of analysis after partial volume correction and other regions of interest are reported in ST3.

### **Differences in DVR gray matter as denominator ( $DVR_{GM}$ ) between first episode psychosis and healthy volunteers**

We found no significant difference between [ $^{18}F$ ]FEPPA  $V_T$  in gray matter between first episode psychosis and healthy volunteers before ( $F_{(1,36)} = .202, p = .656$ ) and after correction for partial volume effects ( $F_{(1,36)} = .68, p = .42$ ).

No significant difference was observed between groups in  $DVR_{GM}$  ( $F_{(2,35)} = 1.12, p = .34$ ). Although not significant, healthy volunteers showed higher  $DVR_{GM}$  than first episode psychosis in dorsolateral prefrontal cortex ( $F_{(1, 36)} = 1.30, p = .26$ ; 2.9% higher in healthy volunteers than first episode psychosis) and hippocampus ( $F_{(1, 36)} = 1.10, p = .30$ ; 8% higher in healthy volunteers than first episode psychosis). Results of analysis after partial volume correction and other regions of interest are reported in ST4.

### **Correlation between [<sup>18</sup>F]FEPPA V<sub>T</sub> and length of illness, severity of symptoms, clinical and neuropsychological measures**

We observed a correlation between with RBANS total score and [<sup>18</sup>F]FEPPA V<sub>T</sub> in hippocampus with the partial volume corrected data ( $r = .51, p = .04$ )

In exploratory correlation analysis after removing 4 participants whom duration of illness is longer than 5 years, we found significant negative correlation between PANSS general subscore and [<sup>18</sup>F]FEPPA V<sub>T</sub> in GM before ( $r = -.57, p = .03$ ) and after correction for partial volume effects ( $r = -.56, p = .04$ ). Moreover we found a significant association of [<sup>18</sup>F]FEPPA V<sub>T</sub> in WB after partial volume effect correction and PANSS general subscore ( $r = -.54, p = .05$ ).

## 2. Supplemental Tables

**TABLE S1. Regional [<sup>18</sup>F]FEPPA V<sub>T</sub> between first episode psychosis and healthy volunteers. Factorial ANOVA were performed for each region of interest to examine the diagnostic groups effect with genotype added as covariates. % difference was calculated as the difference in [<sup>18</sup>F]FEPPA V<sub>T</sub> between the groups (V<sub>T</sub> first episode psychosis – V<sub>T</sub> healthy volunteers) divided by [<sup>18</sup>F]FEPPA V<sub>T</sub> of the healthy volunteers group times 100.**

|                     | ROI             | HV (n = 20)   |      | FEP (n = 19)  |      | Percent Difference | Diagnostic effect |      | Effect size    |
|---------------------|-----------------|---------------|------|---------------|------|--------------------|-------------------|------|----------------|
|                     |                 | Adjusted mean | SE   | Adjusted mean | SE   | %                  | F (1, 36)         | P    | η <sup>2</sup> |
| V <sub>T</sub>      | DLPFC           | 10.26         | 0.62 | 9.64          | 0.64 | -6.07              | 0.49              | 0.49 | .01            |
|                     | HC              | 10.47         | 0.74 | 9.07          | 0.76 | -13.38             | 1.74              | 0.20 | .05            |
|                     | MPFC            | 9.41          | 0.58 | 9.14          | 0.59 | -2.84              | 0.11              | 0.75 | .00            |
|                     | Temporal cortex | 10.35         | 0.60 | 10.00         | 0.62 | -3.35              | 0.16              | 0.69 | .01            |
|                     | GM              | 9.69          | 0.58 | 9.32          | 0.59 | -3.83              | 0.20              | 0.66 | .01            |
|                     | WB              | 8.96          | 0.53 | 8.69          | 0.54 | -3.00              | 0.13              | 0.73 | .00            |
|                     | Cerebellum      | 10.34         | 0.74 | 10.61         | 0.76 | 2.61               | 0.07              | 0.80 | .00            |
| PVEC V <sub>T</sub> | DLPFC           | 12.71         | 0.77 | 11.81         | 0.79 | -7.06              | 0.67              | 0.42 | .02            |
|                     | HC              | 10.98         | 0.77 | 9.50          | 0.79 | -13.48             | 1.82              | 0.19 | .05            |
|                     | MPFC            | 10.35         | 0.63 | 10.15         | 0.65 | -1.96              | 0.05              | 0.82 | .00            |
|                     | Temporal cortex | 11.67         | 0.69 | 11.41         | 0.70 | -2.19              | 0.07              | 0.80 | .00            |
|                     | GM              | 12.06         | 0.75 | 11.18         | 0.76 | -7.29              | 0.68              | 0.42 | .02            |
|                     | WB              | 12.34         | 0.77 | 11.57         | 0.79 | -6.23              | 0.48              | 0.49 | .01            |
|                     | Cerebellum      | 11.06         | 0.76 | 11.38         | 0.77 | 2.82               | 0.08              | 0.77 | .00            |

Abbreviations: DLPFC, dorsolateral prefrontal cortex; FEP, first episode of psychosis; GM, gray matter; HC, hippocampus; HV, healthy volunteer; MPFC, medial prefrontal cortex; SE, standard error; V<sub>T</sub>, Volume of distribution; WB, whole brain.

**TABLE S2. Regional distribution volume ratio of cerebellum ( $DVR_{Cer}$ ) between first episode psychosis and healthy volunteers.  $DVR_{Cer}$  was calculated as the ratio  $[^{18}F]FEPPA V_T$  of region to  $[^{18}F]FEPPA V_T$  of cerebellum. % difference was calculated as the difference in  $DVR_{Cer}$  between the groups ( $V_T$  first episode psychosis –  $V_T$  healthy volunteers) divided by  $DVR_{Cer}$  of the healthy volunteers group times a 100.**

|                       |                 | HV (n = 20)   |      | FEP (n = 19)  |      | Percent Difference | Diagnostic effect |      | Effect size |
|-----------------------|-----------------|---------------|------|---------------|------|--------------------|-------------------|------|-------------|
| ROI                   |                 | Adjusted mean | SE   | Adjusted mean | SE   | %                  | F (1, 36)         | P    | $\eta^2$    |
| $DVR_{Cer}$           | DLPFC           | 1.00          | 0.03 | 0.94          | 0.03 | -6.77              | 2.64              | 0.11 | .07         |
|                       | HC              | 1.02          | 0.06 | 0.89          | 0.06 | -12.09             | 2.42              | 0.13 | .06         |
|                       | MPFC            | 0.92          | 0.03 | 0.89          | 0.03 | -3.47              | 0.65              | 0.43 | .02         |
|                       | Temporal cortex | 1.01          | 0.03 | 0.98          | 0.03 | -2.48              | 0.33              | 0.57 | .01         |
|                       | GM              | 0.95          | 0.03 | 0.90          | 0.03 | -4.64              | 1.55              | 0.22 | .04         |
|                       | WB              | 0.88          | 0.02 | 0.84          | 0.02 | -3.99              | 1.29              | 0.26 | .04         |
| $DVR_{Cer}$ with PVEC | DLPFC           | 1.17          | 0.04 | 1.06          | 0.04 | -8.83              | 4.10              | 0.05 | .10         |
|                       | HC              | 1.00          | 0.05 | 0.87          | 0.05 | -13.20             | 3.08              | 0.09 | .08         |
|                       | MPFC            | 0.95          | 0.03 | 0.92          | 0.03 | -3.78              | 0.70              | 0.41 | .02         |
|                       | Temporal cortex | 1.06          | 0.03 | 1.04          | 0.03 | -2.53              | 0.32              | 0.57 | .01         |
|                       | GM              | 1.10          | 0.03 | 1.00          | 0.03 | -9.07              | 5.84              | 0.02 | .14         |
|                       | WB              | 1.13          | 0.03 | 1.04          | 0.03 | -8.07              | 4.70              | 0.04 | .12         |

Abbreviations: DLPFC, dorsolateral prefrontal cortex; DVR, distribution volume ratio; FEP, first episode of psychosis; GM, gray matter; HC, hippocampus; ; HV, healthy volunteer; MPFC, medial prefrontal cortex; ; ROI, region of interest; SE, standard error; WB, whole brain.

**TABLE S3. Regional distribution volume ratio of whole brain (DVR<sub>WB</sub>) between first episode psychosis and healthy volunteers. DVR<sub>WB</sub> was calculated as the ratio [<sup>18</sup>F] FEPPA V<sub>T</sub> of region to [<sup>18</sup>F] FEPPA V<sub>T</sub> of whole brain. % difference was calculated as the difference in DVR<sub>WB</sub> between the groups (V<sub>T</sub> first episode psychosis – V<sub>T</sub> healthy volunteers) divided by DVR<sub>WB</sub> of the healthy volunteers group times a 100.**

|                                   |                        | HV (n = 20)   |      | FEP (n = 19)  |      | Percent Difference | Diagnostic effect |      | Effect Size    |
|-----------------------------------|------------------------|---------------|------|---------------|------|--------------------|-------------------|------|----------------|
|                                   | ROI                    | Adjusted mean | SE   | Adjusted mean | SE   | %                  | F (1, 36)         | P    | η <sup>2</sup> |
| <b>DVR<sub>WB</sub></b>           | <b>DLPFC</b>           | 1.15          | 0.02 | 1.11          | 0.02 | -3.74              | 1.71              | 0.20 | .05            |
|                                   | <b>HC</b>              | 1.17          | 0.05 | 1.06          | 0.06 | -9.43              | 1.71              | 0.20 | .05            |
|                                   | <b>MPFC</b>            | 1.05          | 0.02 | 1.05          | 0.02 | -0.18              | 0.01              | 0.94 | .00            |
|                                   | <b>Temporal cortex</b> | 1.15          | 0.02 | 1.17          | 0.03 | 1.04               | 0.08              | 0.78 | .00            |
|                                   | <b>GM</b>              | 1.08          | 0.00 | 1.07          | 0.01 | -1.01              | 0.99              | 0.33 | .03            |
|                                   | <b>Cerebellum</b>      | 1.15          | 0.04 | 1.23          | 0.05 | 7.07               | 1.37              | 0.25 | .04            |
| <b>DVR<sub>WB</sub> with PVEC</b> | <b>DLPFC</b>           | 1.04          | 0.01 | 1.02          | 0.02 | -1.25              | 0.28              | 0.60 | .01            |
|                                   | <b>HC</b>              | 0.89          | 0.05 | 0.85          | 0.05 | -4.06              | 0.26              | 0.62 | .01            |
|                                   | <b>MPFC</b>            | 0.85          | 0.01 | 0.88          | 0.02 | -0.18              | 3.52              | 0.07 | .09            |
|                                   | <b>Temporal cortex</b> | 0.94          | 0.03 | 1.01          | 0.04 | 1.04               | 1.94              | 0.17 | .05            |
|                                   | <b>GM</b>              | 0.98          | 0.00 | 0.97          | 0.00 | -1.01              | 4.23              | 0.05 | .11            |
|                                   | <b>Cerebellum</b>      | 0.89          | 0.04 | 1.01          | 0.05 | 7.07               | 3.12              | 0.07 | .08            |

Abbreviations: DLPFC, dorsolateral prefrontal cortex; DVR, distribution volume ratio; FEP, first episode of psychosis; GM, gray matter; HC, hippocampus; HV, healthy volunteer; MPFC, medial prefrontal cortex; ; ROI, region of interest; SE, standard error; WB, whole brain.



**TABLE S4. Regional distribution volume ratio of gray matter (DVR<sub>GM</sub>) between first episode psychosis and healthy volunteers. DVR<sub>GM</sub> was calculated as the ratio [<sup>18</sup>F] FEPPA V<sub>T</sub> of region to [<sup>18</sup>F] FEPPA V<sub>T</sub> of gray matter. % Difference was calculated as the difference in DVR<sub>GM</sub> between the groups (V<sub>T</sub> first episode psychosis – V<sub>T</sub> healthy volunteers) divided by DVR<sub>GM</sub> of the healthy volunteers group times a 100.**

|                                   | Gray matter ROI        | HV (n = 20)   |      | FEP (n = 19)  |      | Percent Difference % | Diagnostic effect |      | Effect size $\eta^2$ |
|-----------------------------------|------------------------|---------------|------|---------------|------|----------------------|-------------------|------|----------------------|
|                                   |                        | Adjusted mean | SE   | Adjusted mean | SE   |                      | F (1, 36)         | P    |                      |
| <b>DVR<sub>GM</sub></b>           | <b>DLPFC</b>           | 1.06          | 0.02 | 1.03          | 0.02 | -2.91                | 1.30              | 0.26 | .04                  |
|                                   | <b>HC</b>              | 1.08          | 0.06 | 0.99          | 0.06 | -7.97                | 1.10              | 0.30 | .03                  |
|                                   | <b>MPFC</b>            | 0.98          | 0.02 | 0.98          | 0.02 | 0.61                 | 0.07              | 0.80 | .00                  |
|                                   | <b>Temporal cortex</b> | 1.07          | 0.03 | 1.09          | 0.03 | 2.34                 | 0.34              | 0.56 | .01                  |
|                                   | <b>Cerebellum</b>      | 1.06          | 0.05 | 1.15          | 0.06 | 8.86                 | 1.49              | 0.23 | .04                  |
|                                   | <b>WB</b>              | 0.93          | 0.00 | 0.94          | 0.01 | 1.07                 | 1.06              | 0.31 | .03                  |
| <b>DVR<sub>GM</sub> with PVEC</b> | <b>DLPFC</b>           | 1.06          | 0.02 | 1.06          | 0.02 | -0.09                | 0.00              | 0.97 | .00                  |
|                                   | <b>HC</b>              | 0.91          | 0.05 | 0.88          | 0.05 | -3.08                | 0.14              | 0.72 | .00                  |
|                                   | <b>MPFC</b>            | 0.86          | 0.02 | 0.92          | 0.02 | 5.90                 | 5.08              | 0.03 | .12                  |
|                                   | <b>Temporal cortex</b> | 0.97          | 0.04 | 1.05          | 0.04 | 8.59                 | 2.55              | 0.12 | .07                  |
|                                   | <b>Cerebellum</b>      | 0.91          | 0.05 | 1.04          | 0.05 | 14.48                | 3.68              | 0.06 | .09                  |
|                                   | <b>WB</b>              | 1.02          | 0.00 | 1.04          | 0.00 | 1.17                 | 4.17              | 0.05 | .10                  |

Abbreviations: DLPFC, dorsolateral prefrontal cortex; DVR, distribution volume ratio; FEP, first episode of psychosis; GM, gray matter; HC, hippocampus; HV, healthy volunteer; MPFC, medial prefrontal cortex ; ROI, region of interest; SE, standard error; WB, whole brain.

**TABLE S5. Association between regional [<sup>18</sup>F] FEPPA V<sub>T</sub> and psychopathology, adjusted for TSPO genotype (rs6971).**

| V <sub>T</sub>                 | Age at onset |          | Number of crises |          | Length of illness |          | GAF      |          |
|--------------------------------|--------------|----------|------------------|----------|-------------------|----------|----------|----------|
|                                | r            | p        | r                | p        | r                 | p        | r        | p        |
| <b>DLPFC</b>                   | -0.09        | 0.78     | -0.04            | 0.91     | -0.56             | 0.06     | -0.13    | 0.70     |
| <b>HC</b>                      | -0.49        | 0.10     | -0.21            | 0.51     | -0.15             | 0.64     | -0.16    | 0.61     |
| <b>MPFC</b>                    | -0.25        | 0.43     | -0.03            | 0.92     | -0.49             | 0.10     | -0.17    | 0.60     |
| <b>Temporal cortex</b>         | -0.31        | 0.32     | -0.02            | 0.96     | -0.47             | 0.12     | -0.15    | 0.64     |
| <b>GM</b>                      | -0.15        | 0.62     | -0.09            | 0.79     | -0.54             | 0.07     | -0.18    | 0.57     |
| <b>WB</b>                      | -0.14        | 0.67     | -0.02            | 0.94     | -0.49             | 0.10     | -0.23    | 0.47     |
| <b>V<sub>T</sub> with PVEC</b> | <b>r</b>     | <b>p</b> | <b>r</b>         | <b>p</b> | <b>r</b>          | <b>p</b> | <b>r</b> | <b>p</b> |
| <b>DLPFC</b>                   | -0.07        | 0.83     | 0.02             | 0.96     | -0.56             | 0.06     | -0.13    | 0.70     |
| <b>HC</b>                      | -0.47        | 0.13     | -0.27            | 0.40     | -0.19             | 0.56     | -0.16    | 0.62     |
| <b>MPFC</b>                    | -0.17        | 0.59     | -0.01            | 0.99     | -0.48             | 0.11     | -0.23    | 0.47     |
| <b>Temporal cortex</b>         | -0.25        | 0.43     | -0.03            | 0.92     | -0.48             | 0.11     | -0.19    | 0.56     |
| <b>GM</b>                      | -0.15        | 0.64     | -0.13            | 0.70     | -0.58             | 0.05     | -0.16    | 0.62     |
| <b>WB</b>                      | -0.14        | 0.67     | -0.10            | 0.75     | -0.55             | 0.06     | -0.20    | 0.53     |

Abbreviations: DLPFC, dorsolateral prefrontal cortex; FEP, first episode of psychosis; GM, gray matter; HC, hippocampus; MPFC, medial prefrontal cortex; ; ROI, region of interest; SE, standard error; WB, whole brain.

**TABLE S6. Association between [<sup>18</sup>F]FEPPA V<sub>T</sub> and PANSS scores in first episode psychosis, adjusted for TSPO genotype (rs6971).**

| V <sub>T</sub>           | Positive |      | Negative |      | General |      | Total |      |
|--------------------------|----------|------|----------|------|---------|------|-------|------|
| ROI                      | r        | p    | r        | p    | r       | p    | r     | p    |
| <b>DLPFC</b>             | -0.20    | 0.44 | 0.08     | 0.76 | -0.28   | 0.25 | -0.18 | 0.48 |
| <b>HC</b>                | -0.23    | 0.35 | -0.11    | 0.67 | -0.28   | 0.27 | -0.27 | 0.28 |
| <b>MPFC</b>              | -0.16    | 0.52 | -0.01    | 0.97 | -0.28   | 0.26 | -0.21 | 0.41 |
| <b>Temporal cortex</b>   | -0.25    | 0.32 | 0.02     | 0.95 | -0.25   | 0.31 | -0.21 | 0.42 |
| <b>GM</b>                | -0.28    | 0.26 | 0.02     | 0.95 | -0.39   | 0.11 | -0.29 | 0.25 |
| <b>WB</b>                | -0.33    | 0.18 | 0.05     | 0.85 | -0.40   | 0.10 | -0.30 | 0.23 |
| V <sub>T</sub> with PVEC | r        | p    | r        | p    | r       | p    | r     | p    |
| <b>DLPFC</b>             | -0.14    | 0.59 | 0.03     | 0.90 | -0.30   | 0.23 | -0.19 | 0.45 |
| <b>HC</b>                | -0.19    | 0.46 | -0.12    | 0.63 | -0.28   | 0.27 | -0.26 | 0.29 |
| <b>MPFC</b>              | -0.11    | 0.66 | -0.03    | 0.92 | -0.24   | 0.35 | -0.18 | 0.48 |
| <b>Temporal cortex</b>   | -0.18    | 0.49 | 0.02     | 0.95 | -0.22   | 0.38 | -0.17 | 0.51 |
| <b>GM</b>                | -0.23    | 0.36 | -0.02    | 0.94 | -0.39   | 0.12 | -0.29 | 0.25 |
| <b>WB</b>                | -0.22    | 0.38 | 0.01     | 0.96 | -0.37   | 0.14 | -0.26 | 0.30 |

Abbreviations: DLPFC, dorsolateral prefrontal cortex; FEP, first episode of psychosis; GM, gray matter; HC, hippocampus; MPFC, medial prefrontal cortex; ; ROI, region of interest; SE, standard error; WB, whole brain.

**TABLE S7. Association between [<sup>18</sup>F]FEPPA V<sub>T</sub> and SANS scores in first episode psychosis, adjusted for TSPO genotype (rs6971). None of the significant correlations survived correction for multiple comparisons.**

| V <sub>T</sub>                 | Affective |          | Inappropriate affect |          | Alogia   |          | Avolition |          | Anhedonia |          | Attention    |              | Total    |          | Total global |          |
|--------------------------------|-----------|----------|----------------------|----------|----------|----------|-----------|----------|-----------|----------|--------------|--------------|----------|----------|--------------|----------|
|                                | R         | p        | r                    | p        | r        | p        | r         | p        | r         | p        | r            | p            | r        | p        | r            | p        |
| <b>DLPFC</b>                   | 0.18      | 0.47     | -0.16                | 0.53     | -0.06    | 0.82     | -0.23     | 0.37     | 0.14      | 0.58     | -0.12        | 0.64         | 0.01     | 0.96     | -0.01        | 0.98     |
| <b>HC</b>                      | 0.08      | 0.74     | -0.28                | 0.25     | -0.39    | 0.11     | -0.20     | 0.42     | -0.17     | 0.50     | <b>-0.48</b> | <b>0.04*</b> | -0.28    | 0.41     | -0.22        | 0.38     |
| <b>MPFC</b>                    | 0.13      | 0.62     | -0.24                | 0.34     | -0.22    | 0.37     | -0.27     | 0.27     | 0.11      | 0.68     | -0.18        | 0.47         | -0.08    | 0.77     | -0.08        | 0.76     |
| <b>Temporal cortex</b>         | 0.13      | 0.62     | -0.14                | 0.57     | -0.16    | 0.54     | -0.29     | 0.24     | -0.01     | 0.96     | -0.30        | 0.23         | -0.09    | 0.72     | -0.12        | 0.64     |
| <b>GM</b>                      | 0.21      | 0.40     | -0.30                | 0.23     | -0.18    | 0.48     | -0.24     | 0.33     | 0.10      | 0.70     | -0.15        | 0.56         | -0.02    | 0.92     | -0.04        | 0.88     |
| <b>WB</b>                      | 0.27      | 0.28     | -0.30                | 0.23     | -0.16    | 0.54     | -0.19     | 0.46     | 0.11      | 0.68     | -0.15        | 0.56         | 0.017    | 0.95     | -0.00        | 0.99     |
| <b>V<sub>T</sub> with PVEC</b> | <b>r</b>  | <b>p</b> | <b>r</b>             | <b>p</b> | <b>r</b> | <b>p</b> | <b>r</b>  | <b>p</b> | <b>r</b>  | <b>p</b> | <b>r</b>     | <b>p</b>     | <b>r</b> | <b>p</b> | <b>r</b>     | <b>p</b> |
| <b>DLPFC</b>                   | 0.13      | 0.62     | -0.02                | 0.48     | -0.08    | 0.75     | -0.23     | 0.37     | 0.14      | 0.59     | -0.15        | 0.54         | -0.02    | 0.94     | -0.04        | 0.89     |
| <b>HC</b>                      | 0.05      | 0.85     | -0.29                | 0.25     | -0.41    | 0.10     | -0.24     | 0.36     | -0.18     | 0.47     | <b>-0.48</b> | <b>0.04*</b> | -0.23    | 0.35     | -0.25        | 0.32     |
| <b>MPFC</b>                    | 0.10      | 0.69     | -0.22                | 0.37     | -0.21    | 0.41     | -0.24     | 0.33     | 0.13      | 0.62     | -0.16        | 0.52         | -0.07    | 0.79     | -0.05        | 0.84     |
| <b>Temporal cortex</b>         | 0.10      | 0.69     | -0.13                | 0.61     | -0.14    | 0.57     | -0.29     | 0.24     | 0.00      | 0.99     | -0.29        | 0.24         | -0.09    | 0.72     | -0.11        | 0.66     |
| <b>GM</b>                      | 0.15      | 0.55     | -0.31                | 0.21     | -0.21    | 0.39     | -0.28     | 0.27     | 0.09      | 0.72     | -0.15        | 0.55         | -0.07    | 0.78     | -0.07        | 0.77     |
| <b>WB</b>                      | 0.18      | 0.47     | -0.28                | 0.26     | -0.20    | 0.44     | -0.26     | 0.30     | 0.12      | 0.65     | -0.15        | 0.56         | -0.04    | 0.87     | -0.05        | 0.83     |

\*  $p < 0.05$ ; adjusted  $p$ -value threshold:  $p < 0.008$  for SANS subscales

Abbreviations: DLPFC, dorsolateral prefrontal cortex; FEP, first episode of psychosis; GM, gray matter; HC, hippocampus; MPFC, medial prefrontal cortex; ; ROI, region of interest; SE, standard error; WB, whole brain.

**TABLE S8. Association between [<sup>18</sup>F]FEPPA V<sub>T</sub> and RBANS scores in first episode psychosis (n = 18<sup>#</sup>), adjusted for TSPO genotype (rs6971).**

| V <sub>T</sub>                 | Immediate memory |          | Visuospatial |          | Language |          | Attention   |              | Delayed memory |          | Total       |              |
|--------------------------------|------------------|----------|--------------|----------|----------|----------|-------------|--------------|----------------|----------|-------------|--------------|
|                                | r                | p        | r            | p        | r        | p        | r           | p            | r              | p        | r           | p            |
| <b>DLPFC</b>                   | -0.11            | 0.69     | -0.25        | 0.34     | -0.22    | 0.41     | -0.06       | 0.82         | -0.08          | 0.78     | -0.14       | 0.60         |
| <b>HC</b>                      | 0.40             | 0.12     | 0.35         | 0.17     | 0.28     | 0.28     | <b>0.49</b> | <b>0.05*</b> | 0.27           | 0.30     | <b>0.50</b> | <b>0.04*</b> |
| <b>MPFC</b>                    | 0.16             | 0.53     | -0.00        | 0.99     | -0.06    | 0.85     | 0.02        | 0.95         | -0.03          | 0.91     | 0.07        | 0.78         |
| <b>Temporal cortex</b>         | 0.18             | 0.50     | 0.16         | 0.55     | -0.10    | 0.70     | 0.03        | 0.90         | 0.04           | 0.89     | 0.11        | 0.67         |
| <b>GM</b>                      | 0.03             | 0.92     | -0.16        | 0.53     | -0.21    | 0.43     | -0.04       | 0.87         | 0.02           | 0.96     | -0.05       | 0.85         |
| <b>WB</b>                      | 0.03             | 0.90     | -0.17        | 0.51     | -0.20    | 0.44     | -0.05       | 0.85         | 0.02           | 0.94     | -0.05       | 0.85         |
| <b>V<sub>T</sub> with PVEC</b> | <b>r</b>         | <b>p</b> | <b>r</b>     | <b>p</b> | <b>r</b> | <b>p</b> | <b>r</b>    | <b>p</b>     | <b>r</b>       | <b>p</b> | <b>r</b>    | <b>p</b>     |
| <b>DLPFC</b>                   | -0.06            | 0.83     | -0.17        | 0.51     | -0.17    | 0.53     | -0.07       | 0.80         | -0.06          | 0.83     | -0.08       | 0.75         |
| <b>HC</b>                      | 0.39             | 0.12     | 0.38         | 0.13     | 0.26     | 0.32     | <b>0.49</b> | <b>0.05*</b> | 0.30           | 0.24     | <b>0.51</b> | <b>0.04*</b> |
| <b>MPFC</b>                    | 0.20             | 0.45     | 0.05         | 0.84     | -0.02    | 0.93     | 0.00        | 0.99         | -0.02          | 0.93     | 0.10        | 0.70         |
| <b>Temporal cortex</b>         | 0.19             | 0.46     | 0.21         | 0.43     | -0.10    | 0.70     | 0.04        | 0.87         | 0.07           | 0.80     | 0.14        | 0.59         |
| <b>GM</b>                      | 0.07             | 0.79     | -0.13        | 0.62     | -0.15    | 0.57     | -0.03       | 0.91         | 0.03           | 0.92     | -0.01       | 0.98         |
| <b>WB</b>                      | 0.07             | 0.79     | -0.14        | 0.59     | -0.13    | 0.63     | -0.02       | 0.94         | 0.02           | 0.94     | -0.00       | 0.99         |

<sup>#</sup>Data was not available for one subject.

\*  $p < 0.05$ ; adjusted  $p$ -value threshold:  $p < 0.017$  for RBANS subscales

Abbreviations: DLPFC, dorsolateral prefrontal cortex; FEP, first episode of psychosis; GM, gray matter; HC, hippocampus; MPFC, medial prefrontal cortex; ; ROI, region of interest; SE, standard error; WB, whole brain.

**TABLE S9. Association between [<sup>18</sup>F]FEPPA V<sub>T</sub> and apathy scale, depression scale, and pleasure scale scores in first episode psychosis, adjusted for TSPO genotype (rs6971).**

| V <sub>T</sub>           | Apathy scale |      | Depression scale* |      | Pleasure Scale |      |
|--------------------------|--------------|------|-------------------|------|----------------|------|
|                          | r            | p    | r                 | p    | r              | p    |
| <b>DLPFC</b>             | -0.36        | 0.22 | -0.40             | 0.11 | 0.05           | 0.84 |
| <b>HC</b>                | -0.12        | 0.64 | 0.05              | 0.84 | -0.09          | 0.74 |
| <b>MPFC</b>              | -0.23        | 0.38 | -0.29             | 0.26 | 0.03           | 0.92 |
| <b>Temporal cortex</b>   | -0.28        | 0.27 | -0.25             | 0.33 | 0.05           | 0.84 |
| <b>GM</b>                | -0.27        | 0.29 | -0.43             | 0.09 | 0.01           | 0.96 |
| <b>WB</b>                | -0.29        | 0.25 | -0.42             | 0.10 | -0.01          | 0.96 |
| V <sub>T</sub> with PVEC | r            | p    | r                 | p    | r              | p    |
| <b>DLPFC</b>             | -0.31        | 0.22 | -0.36             | 0.16 | 0.03           | 0.91 |
| <b>HC</b>                | -0.13        | 0.61 | 0.05              | 0.86 | -0.08          | 0.75 |
| <b>MPFC</b>              | -0.24        | 0.35 | -0.25             | 0.33 | 0.02           | 0.95 |
| <b>Temporal cortex</b>   | -0.32        | 0.21 | -0.23             | 0.39 | 0.05           | 0.86 |
| <b>GM</b>                | -0.25        | 0.33 | -0.42             | 0.10 | -0.00          | 0.99 |
| <b>WB</b>                | -0.26        | 0.31 | -0.40             | 0.12 | -0.01          | 0.98 |

Data was not available for one subject.

Abbreviations: DLPFC, dorsolateral prefrontal cortex; FEP, first episode of psychosis; GM, gray matter; HC, hippocampus; MPFC, medial prefrontal cortex; ; ROI, region of interest; SE, standard error; WB, whole brain.

**TABLE S10. Association between [<sup>18</sup>F]FEPPA V<sub>T</sub> and PANSS scores in first episode psychosis (n=15) after excluding n = 4 who had first episode more than 5 years before scanning, adjusted for TSPO genotype (rs6971).**

| V <sub>T</sub>           | Positive |      | Negative |      | General      |              | Total |      |
|--------------------------|----------|------|----------|------|--------------|--------------|-------|------|
| ROI                      | r        | p    | r        | p    | r            | p            | r     | p    |
| <b>DLPFC</b>             | -0.18    | 0.54 | -0.05    | 0.87 | -0.43        | 0.13         | -0.30 | 0.30 |
| <b>HC</b>                | -0.24    | 0.41 | -0.11    | 0.70 | -0.48        | 0.08         | -0.38 | 0.19 |
| <b>MPFC</b>              | -0.15    | 0.60 | -0.16    | 0.59 | -0.48        | 0.08         | -0.37 | 0.19 |
| <b>Temporal cortex</b>   | -0.24    | 0.42 | -0.17    | 0.56 | -0.47        | 0.09         | -0.40 | 0.16 |
| <b>GM</b>                | -0.27    | 0.35 | -0.12    | 0.69 | <b>-0.57</b> | <b>0.03</b>  | -0.44 | 0.12 |
| <b>WB</b>                | -0.34    | 0.24 | -0.10    | 0.74 | -0.61        | 0.20         | -0.47 | 0.09 |
| V <sub>T</sub> with PVEC | r        | p    | r        | p    | r            | p            | r     | p    |
| <b>DLPFC</b>             | -0.11    | 0.71 | -0.12    | 0.69 | -0.42        | 0.13         | -0.31 | 0.28 |
| <b>HC</b>                | -0.18    | 0.54 | -0.12    | 0.69 | -0.46        | 0.10         | -0.35 | 0.22 |
| <b>MPFC</b>              | -0.10    | 0.75 | -0.18    | 0.53 | -0.43        | 0.12         | -0.34 | 0.23 |
| <b>Temporal cortex</b>   | -0.14    | 0.63 | -0.17    | 0.55 | -0.42        | 0.13         | -0.35 | 0.23 |
| <b>GM</b>                | -0.22    | 0.46 | -0.15    | 0.61 | <b>-0.56</b> | <b>0.04*</b> | -0.42 | 0.13 |
| <b>WB</b>                | -0.20    | 0.48 | -0.12    | 0.70 | <b>-0.54</b> | <b>0.05*</b> | -0.40 | 0.16 |

\*  $p < 0.05$ ; adjusted  $p$ -value threshold:  $p < 0.017$  for PANSS subscales

Abbreviations: DLPFC, dorsolateral prefrontal cortex; FEP, first episode of psychosis; GM, gray matter; HC, hippocampus; MPFC, medial prefrontal cortex; ; ROI, region of interest; SE, standard error; WB, whole brain.

### 3. Supplemental Figures

**FIGURE S1. Total distribution volume of [<sup>18</sup>F]FEPPA ( $V_T$ ) in psychotic patients (FEP) and healthy volunteers (HV) across different regions of interest (dorsolateral prefrontal cortex, dorsolateral prefrontal cortex, DLPFC; hippocampus, HC; Medial prefrontal cortex, mPFC; Temporal cortex; total gray matter, GM; whole brain, WB) after correction for partial volume effect (PVEC).**

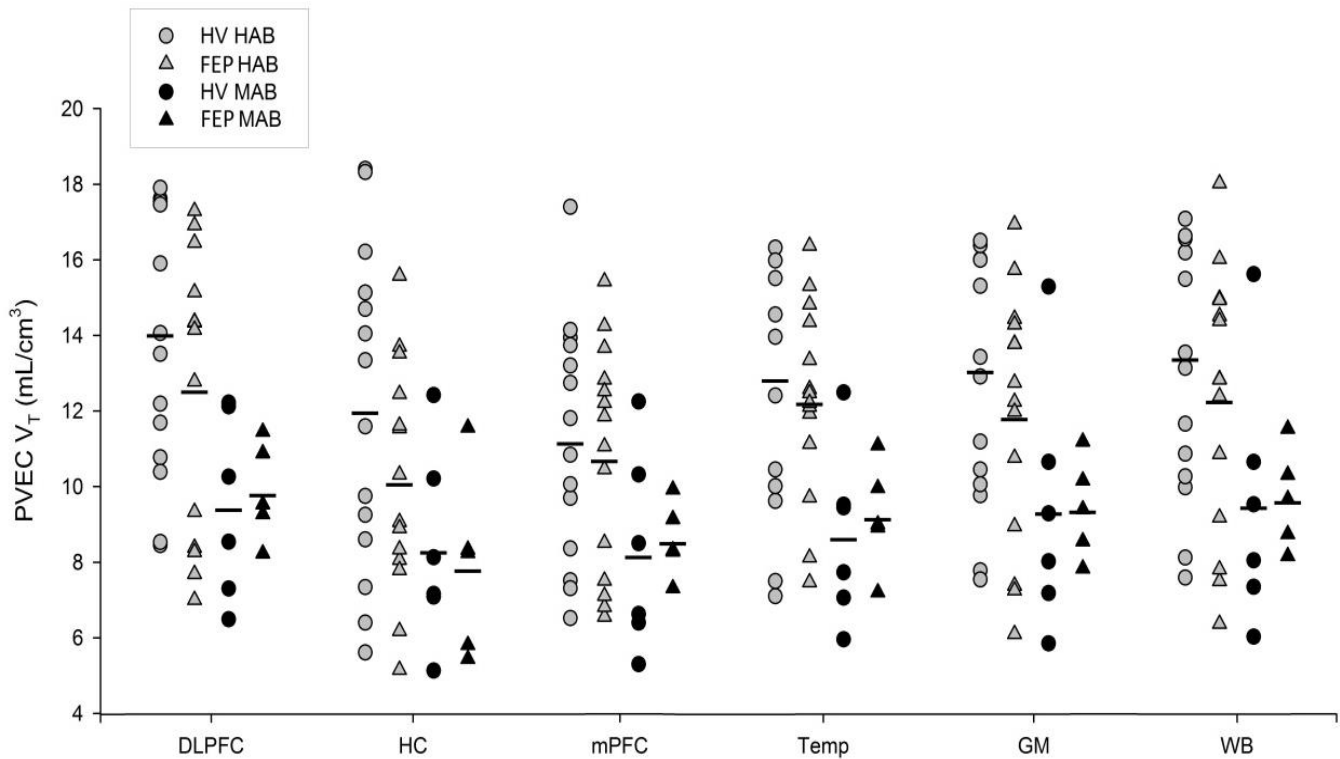



**FIGURE S2.** t-statistical maps of parametric images of [<sup>18</sup>F]FEPPA total distribution volume ( $V_T$ ) overlaid on T1-weighted magnetic resonance imaging (MRI) template. TSPO genotype (rs6971) was added as covariate. Voxel threshold was set to  $p < 0.05$  (FWE corrected).

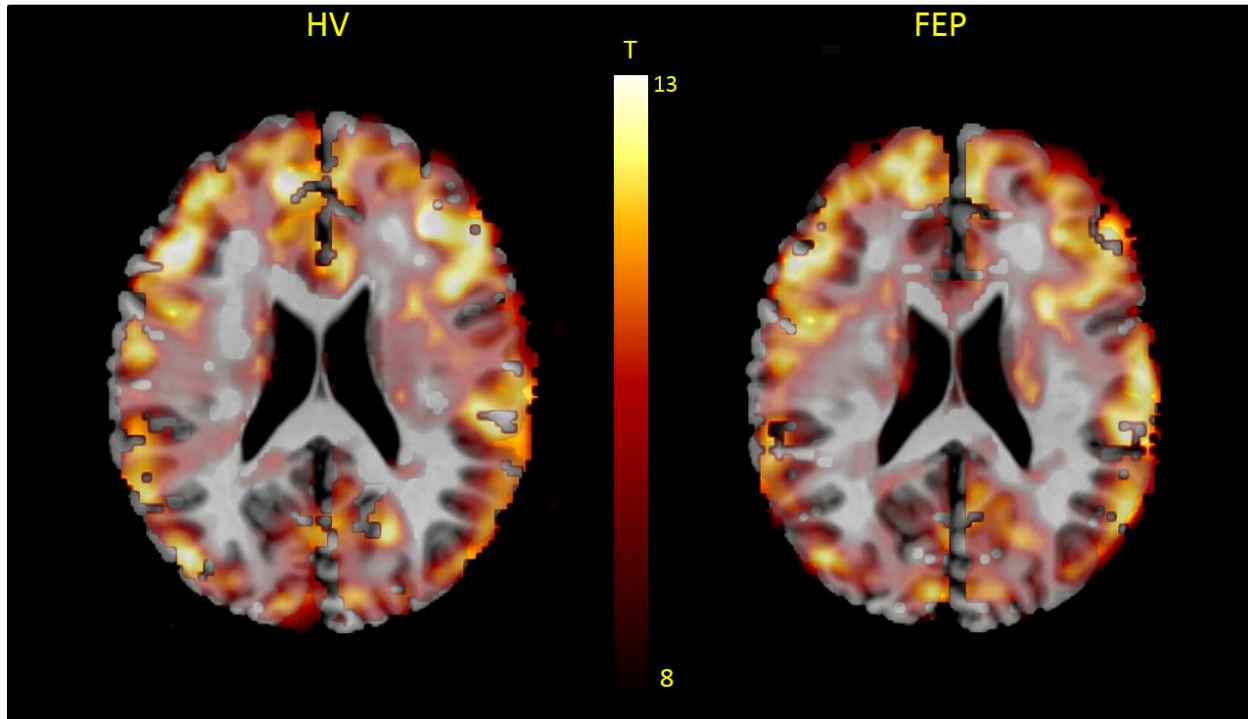

**FIGURE S3. Partial correlation between [<sup>18</sup>F]FEPPA V<sub>T</sub> and the State-Trait Anxiety Inventory (STAI)(22) score controlling for TSPO genotypes (rs6971). A significant positive association between [<sup>18</sup>F]FEPPA V<sub>T</sub> of hippocampus and the score of STAI State subscale (r = .98, p = .02). Caution should be exercised due to very small n.**

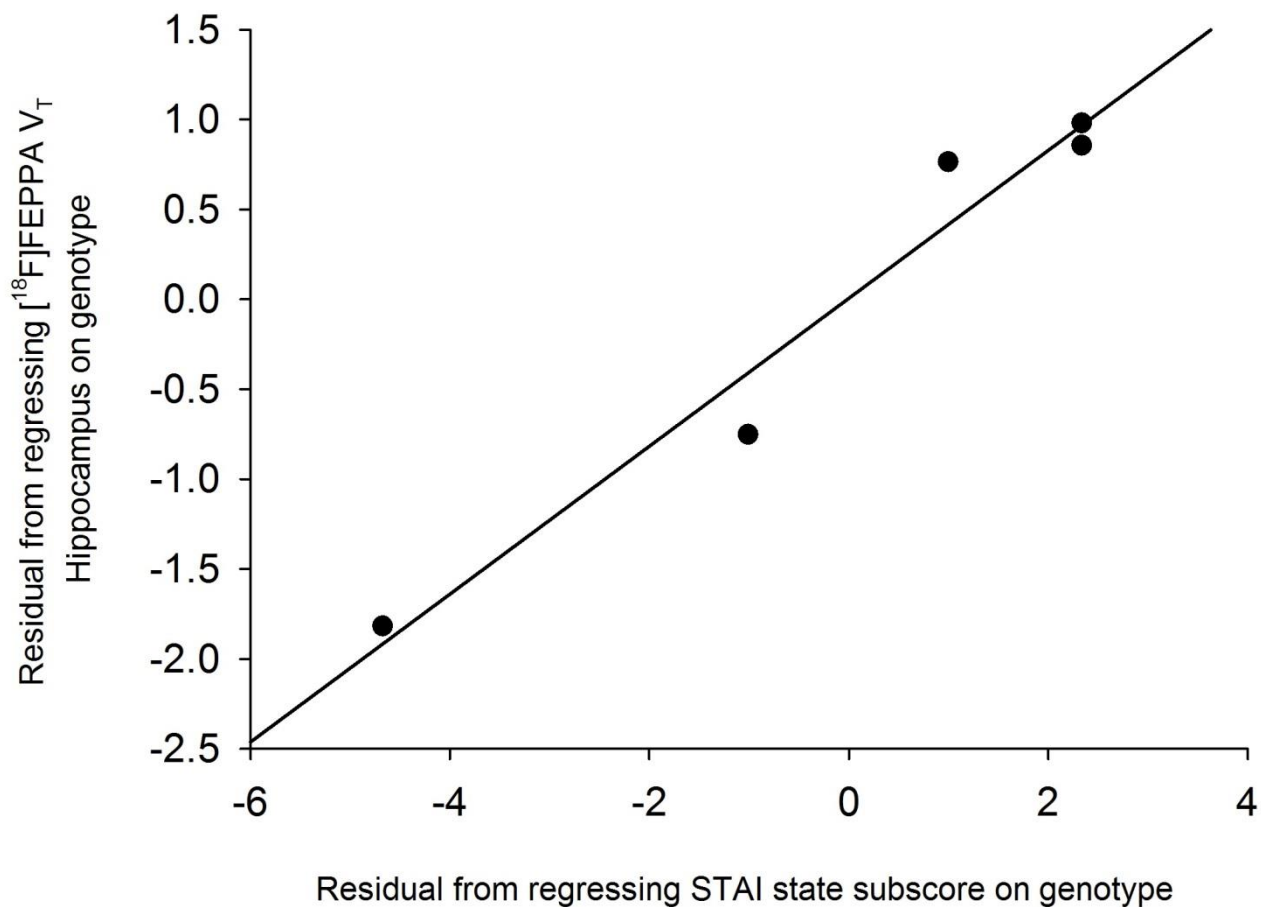

## REFERENCES

1. Kay SR, Flszbein A, Opfer LA. The positive and negative syndrome scale (PANSS) for schizophrenia. *Schizophrenia bulletin*. 1987;13:261.
2. Andreasen NC. Scale for the Assessment of Negative Symptoms (SANS). *The British Journal of Psychiatry*. 1989.
3. Addington D, Addington J, Maticka-Tyndale E. Specificity of the Calgary Depression Scale for schizophrenics. *Schizophrenia research*. 1994;11:239-244.
4. Snaith R, Hamilton M, Morley S, Humayan A, Hargreaves D, Trigwell P. A scale for the assessment of hedonic tone the Snaith-Hamilton Pleasure Scale. *The British Journal of Psychiatry*. 1995;167:99-103.
5. Marin RS, Biedrzycki RC, Firinciogullari S. Reliability and validity of the Apathy Evaluation Scale. *Psychiatry research*. 1991;38:143-162.
6. Jones SH, Thornicroft G, Coffey M, Dunn G. A brief mental health outcome scale-reliability and validity of the Global Assessment of Functioning (GAF). *The British Journal of Psychiatry*. 1995;166:654-659.
7. Randolph C. RBANS manual: Repeatable battery for the assessment of neuropsychological status. San Antonio, TX: The Psychological Corporation. 1998.
8. Wilk CM, Gold JM, Humber K, Dickerson F, Fenton WS, Buchanan RW. Brief cognitive assessment in schizophrenia: normative data for the Repeatable Battery for the Assessment of Neuropsychological Status. *Schizophrenia research*. 2004;70:175-186.
9. Kenk M, Selvanathan T, Rao N, Suridjan I, Rusjan P, Remington G, Meyer JH, Wilson AA, Houle S, Mizrahi R. Imaging neuroinflammation in gray and white matter in schizophrenia: an in-vivo PET study with [18F]-FEPPA. *Schizophr Bull*. 2015;41:85-93.
10. Suridjan I, Pollock BG, Verhoeff NP, Voineskos AN, Chow T, Rusjan PM, Lobaugh NJ, Houle S, Mulsant BH, Mizrahi R. In-vivo imaging of grey and white matter neuroinflammation in Alzheimer's disease: a positron emission tomography study with a novel radioligand, [(18)F]-FEPPA. *Mol Psychiatry*. 2015;20:1579-1587.
11. Rusjan PM, Wilson AA, Bloomfield PM, Vitcu I, Meyer JH, Houle S, Mizrahi R. Quantitation of translocator protein binding in human brain with the novel radioligand [(18)F]-FEPPA and positron emission tomography. *J Cereb Blood Flow Metab*. 2011;31:1807-1816.
12. Leenders KL, Perani D, Lammertsma AA, Heather JD, Buckingham P, Healy MJ, Gibbs JM, Wise RJ, Hatazawa J, Herold S, et al. Cerebral blood flow, blood volume and oxygen utilization. Normal values and effect of age. *Brain*. 1990;113 ( Pt 1):27-47.
13. Muller-Gartner HW, Links JM, Prince JL, Bryan RN, McVeigh E, Leal JP, Davatzikos C, Frost JJ. Measurement of radiotracer concentration in brain gray matter using positron emission tomography: MRI-based correction for partial volume effects. *J Cereb Blood Flow Metab*. 1992;12:571-583.
14. Logan J, Fowler JS, Volkow ND, Wolf AP, Dewey SL, Schlyer DJ, MacGregor RR, Hitzemann R, Bendriem B, Gatley SJ. Graphical analysis of reversible radioligand binding from time-activity measurements applied to [N-11C-methyl]-(-)-cocaine PET studies in human subjects. *J Cereb Blood Flow Metab*;10:740-747.
15. Turkheimer FE, Brett M, Aston JA, Leff AP, Sargent PA, Wise RJ, Grasby PM, Cunningham VJ. Statistical modeling of positron emission tomography images in wavelet space. *Journal of Cerebral Blood Flow & Metabolism*. 2000;20:1610-1618.

16. Rusjan PM, Wilson AA, Bloomfield PM, Vitcu I, Meyer JH, Houle S, Mizrahi R. Quantitation of translocator protein binding in human brain with the novel radioligand [<sup>18</sup>F]-FEPPA and positron emission tomography. *J Cereb Blood Flow Metab.* 2011;31:1807-1816.
17. Mizrahi R, Rusjan PM, Kennedy J, Pollock B, Mulsant B, Suridjan I, De Luca V, Wilson AA, Houle S. Translocator protein (18 kDa) polymorphism (rs6971) explains in-vivo brain binding affinity of the PET radioligand [(18)F]-FEPPA. *J Cereb Blood Flow Metab.* 2012;32:968-972.
18. Lahiri DK, Bye S, Nurnberger JI, Jr., Hodes ME, Crisp M. A non-organic and non-enzymatic extraction method gives higher yields of genomic DNA from whole-blood samples than do nine other methods tested. *J Biochem Biophys Methods.* 1992;25:193-205.
19. Yoder KK, Nho K, Risacher SL, Kim S, Shen L, Saykin AJ. Influence of TSPO genotype on 11C-PBR28 standardized uptake values. *J Nucl Med.* 2013;54:1320-1322.
20. Kreisl WC, Lyoo CH, McGwier M, Snow J, Jenko KJ, Kimura N, Corona W, Morse CL, Zoghbi SS, Pike VW, McMahon FJ, Turner RS, Innis RB, Biomarkers Consortium PETRPT. In vivo radioligand binding to translocator protein correlates with severity of Alzheimer's disease. *Brain.* 2013;136:2228-2238.
21. Owen DR, Yeo AJ, Gunn RN, Song K, Wadsworth G, Lewis A, Rhodes C, Pulford DJ, Bennacef I, Parker CA, StJean PL, Cardon LR, Mooser VE, Matthews PM, Rabiner EA, Rubio JP. An 18-kDa translocator protein (TSPO) polymorphism explains differences in binding affinity of the PET radioligand PBR28. *J Cereb Blood Flow Metab.* 2012;32:1-5.
22. Spielberger CD, Sydeman SJ. State-Trait Anxiety Inventory and State-Trait Anger Expression Inventory. 1994.
